# Supplementary material
Source: Springer Nature journal article supplement (https://www.springermedizin.de/resource/supplementary/13058_2011_2971_MOESM7_ESM.pdf/9702956)

siUQCDFS1  $p=0.852$

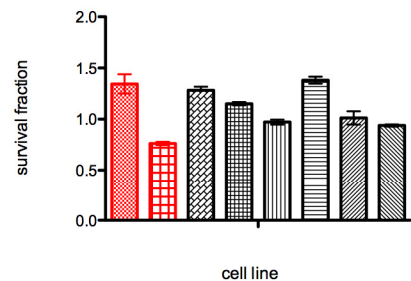

siVSTM2B  $p=0.085$

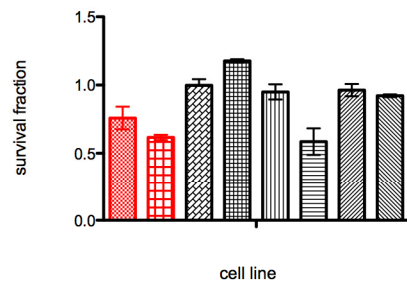

siPOP4  $p=0.044$

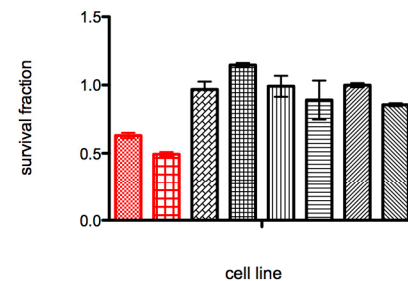

siPLEKHF1  $p=0.00023$

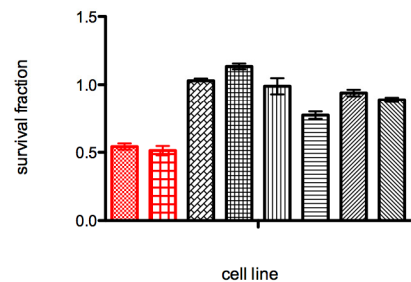

siC19ORF12  $p=0.320$

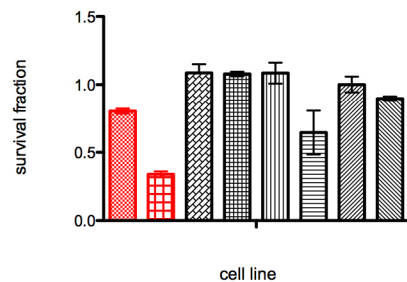

siCCNE1  $p=0.028$

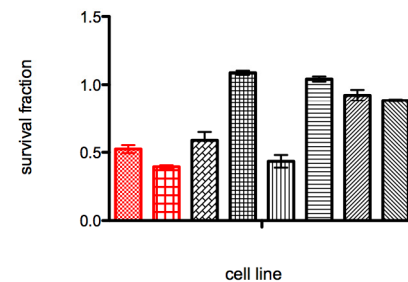

siC19ORF2  $p=0.291$

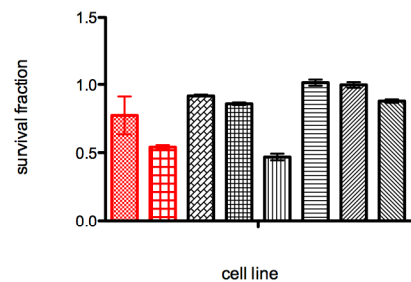

siZNF536  $p=0.004$

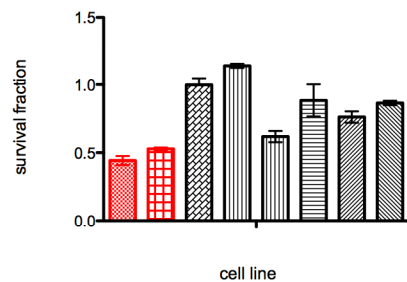

siTSHZ3  $p=0.003$

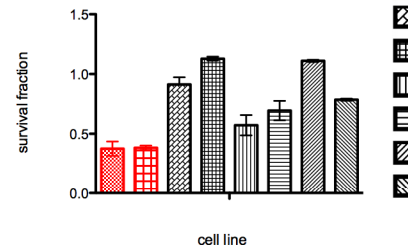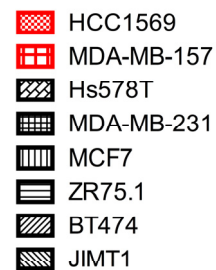

Supplement: MOESM7 [file 9702956]
